# Supplementary material for: Sirolimus-Eluting Balloon for the Treatment of Coronary Lesions in Complex ACS Patients: The SELFIE Registry
Source: Hindawi journal article supplement (doi:10.1155/2020/8865223), 2020-10-16

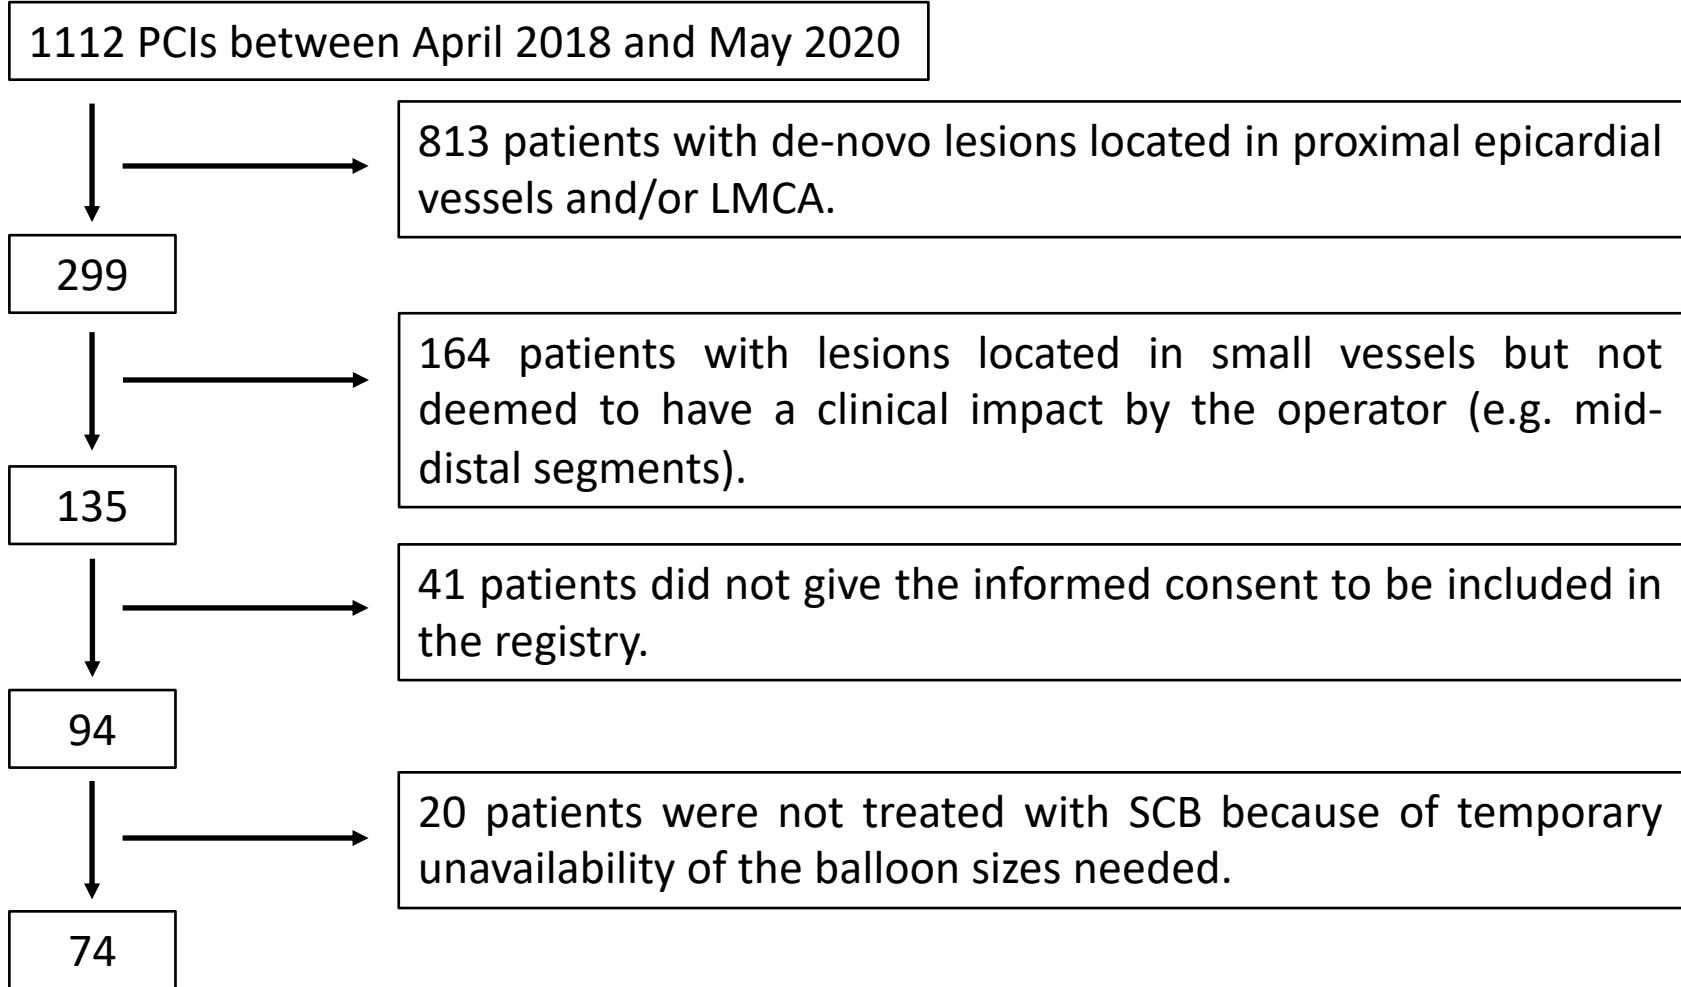

Supplement: f1 [file 8865223.f1.pdf]
